# Supplementary material for: Determination of PD-L1 Expression in Circulating Tumor Cells of NSCLC Patients and Correlation with Response to PD-1/PD-L1 Inhibitors
Source: Cancers (Basel). 2019 Jun 17;11(6):835. doi: 10.3390/cancers11060835 (PMC6627043; doi:10.3390/cancers11060835)
Supplement: Supplementary file 1 [file cancers-11-00835-s001.pdf]

## Supplementary Material: Determination of PD-L1 Expression in Circulating Tumor Cells of NSCLC Patients and Correlation with Response to PD-1/PD-L1 Inhibitors

Melanie Janning, Franca Kobus, Anna Babayan, Harriet Wikman, Janna-Lisa Velthaus, Sonja Bergmann, Stefanie Schatz, Markus Falk, Lars-Arne Berger, Lisa-Marie Böttcher, Sarina Päsler, Tobias M. Gorges, Linda O’Flaherty, Claudia Hille, Simon A. Joosse, Ronald Simon, Markus Tiemann, Carsten Bokemeyer, Martin Reck, Sabine Riethdorf, Klaus Pantel and Sonja Loges

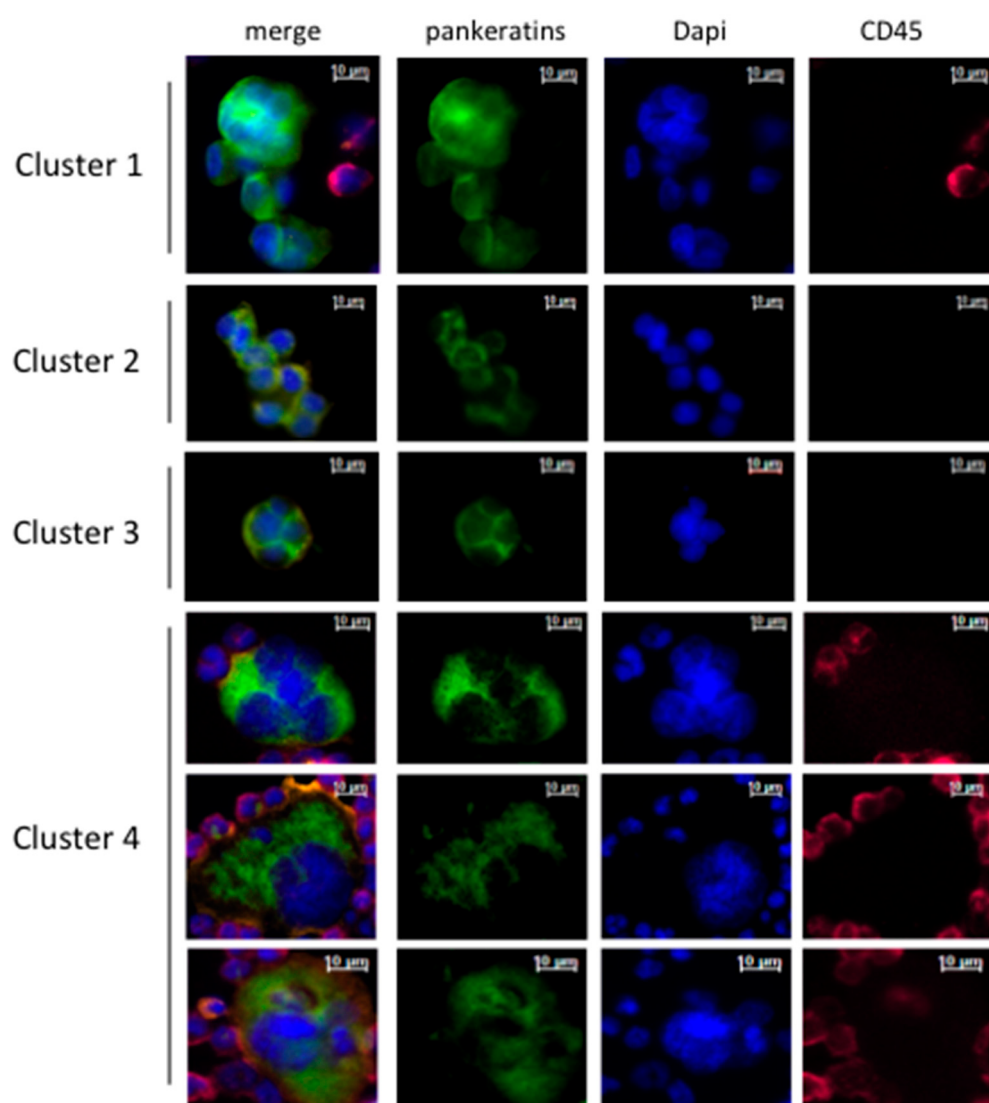

**Figure S1.** Cell cluster identified with label-independent system. Representative images of cell cluster identified by using the label-independent Parsortix system and immunocytochemistry staining with DAPI, anti-pankeratin (AE1/AE3 and C11) and anti-CD45.

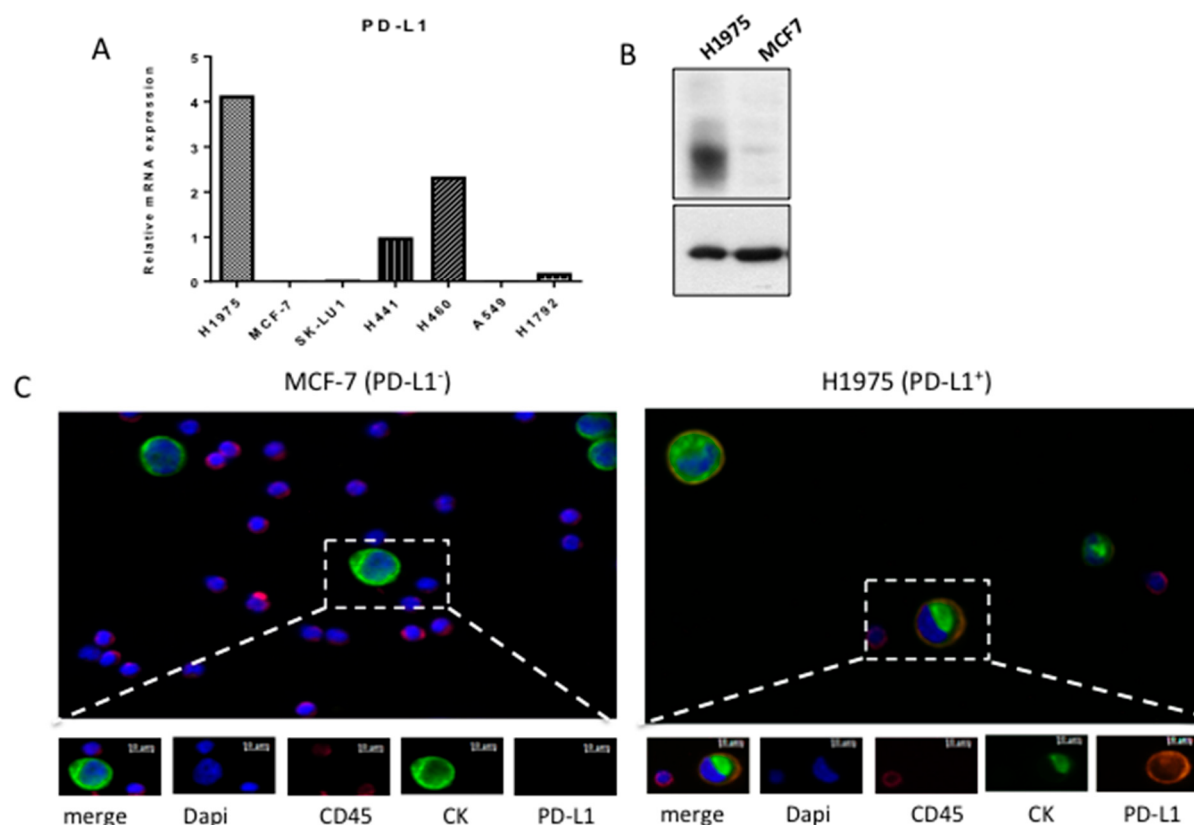

**Figure S2.** Establishing immunocytochemistry for PD-L1 expression by CTCs. **(A)** PD-L1 RNA transcript level adjusted for GAPDH expression were analyzed from different human cells lines with SyBr green qRT-PCR using primer AGTCAATGCCCCATACAACAAA and TGATGGTCACTGCTTGTCCAG for PD-L1. **(B)** PD-L1 protein level in different human cancer cell lines using anti-PD-L1 (E1L3N). **(C)** Immunocytochemistry staining with DAPI, anti-pankeratin (AE1/AE3 and C11), anti-CD45 and anti-PD-L1 (D8T4X) of H1965 and MCF7 cells spiked in mononucleated cells separated by Ficoll gradient from healthy individuals.

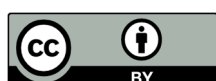

© 2019 by the authors. Licensee MDPI, Basel, Switzerland. This article is an open access article distributed under the terms and conditions of the Creative Commons Attribution (CC BY) license (<http://creativecommons.org/licenses/by/4.0/>).
